# Supplementary material
Source: Springer Nature journal article supplement (https://www.springermedizin.de/resource/supplementary/12931_2009_764_MOESM1_ESM.pdf/9424890)

## Additional file 1.

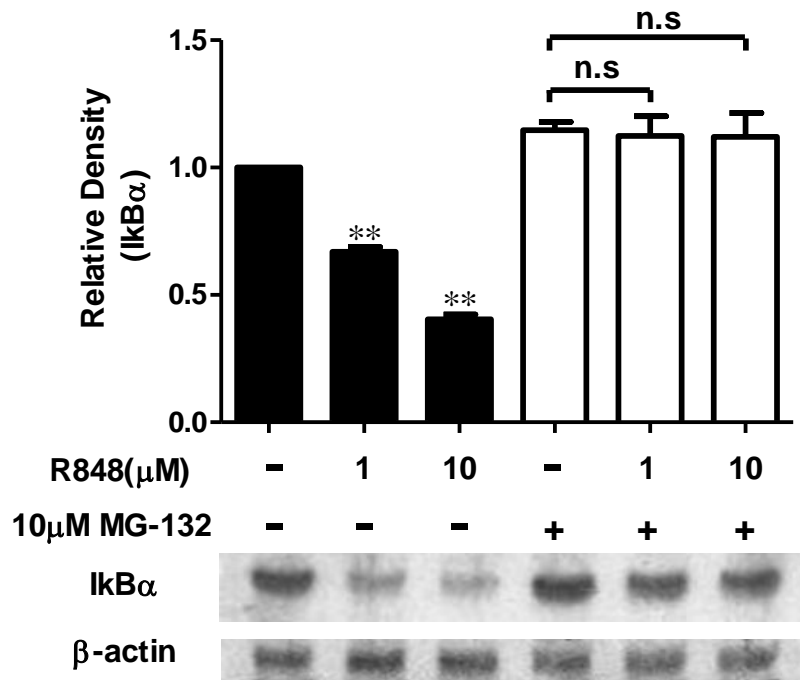

Supplement: MOESM1 [file 9424890]
